# Supplementary material
Source: PubMed Central journal article supplement (PMC8092506)
Supplement: AAC.02007-20-s0001.pdf [file AAC.02007-20-s0001.pdf]

## Supplemental Figure

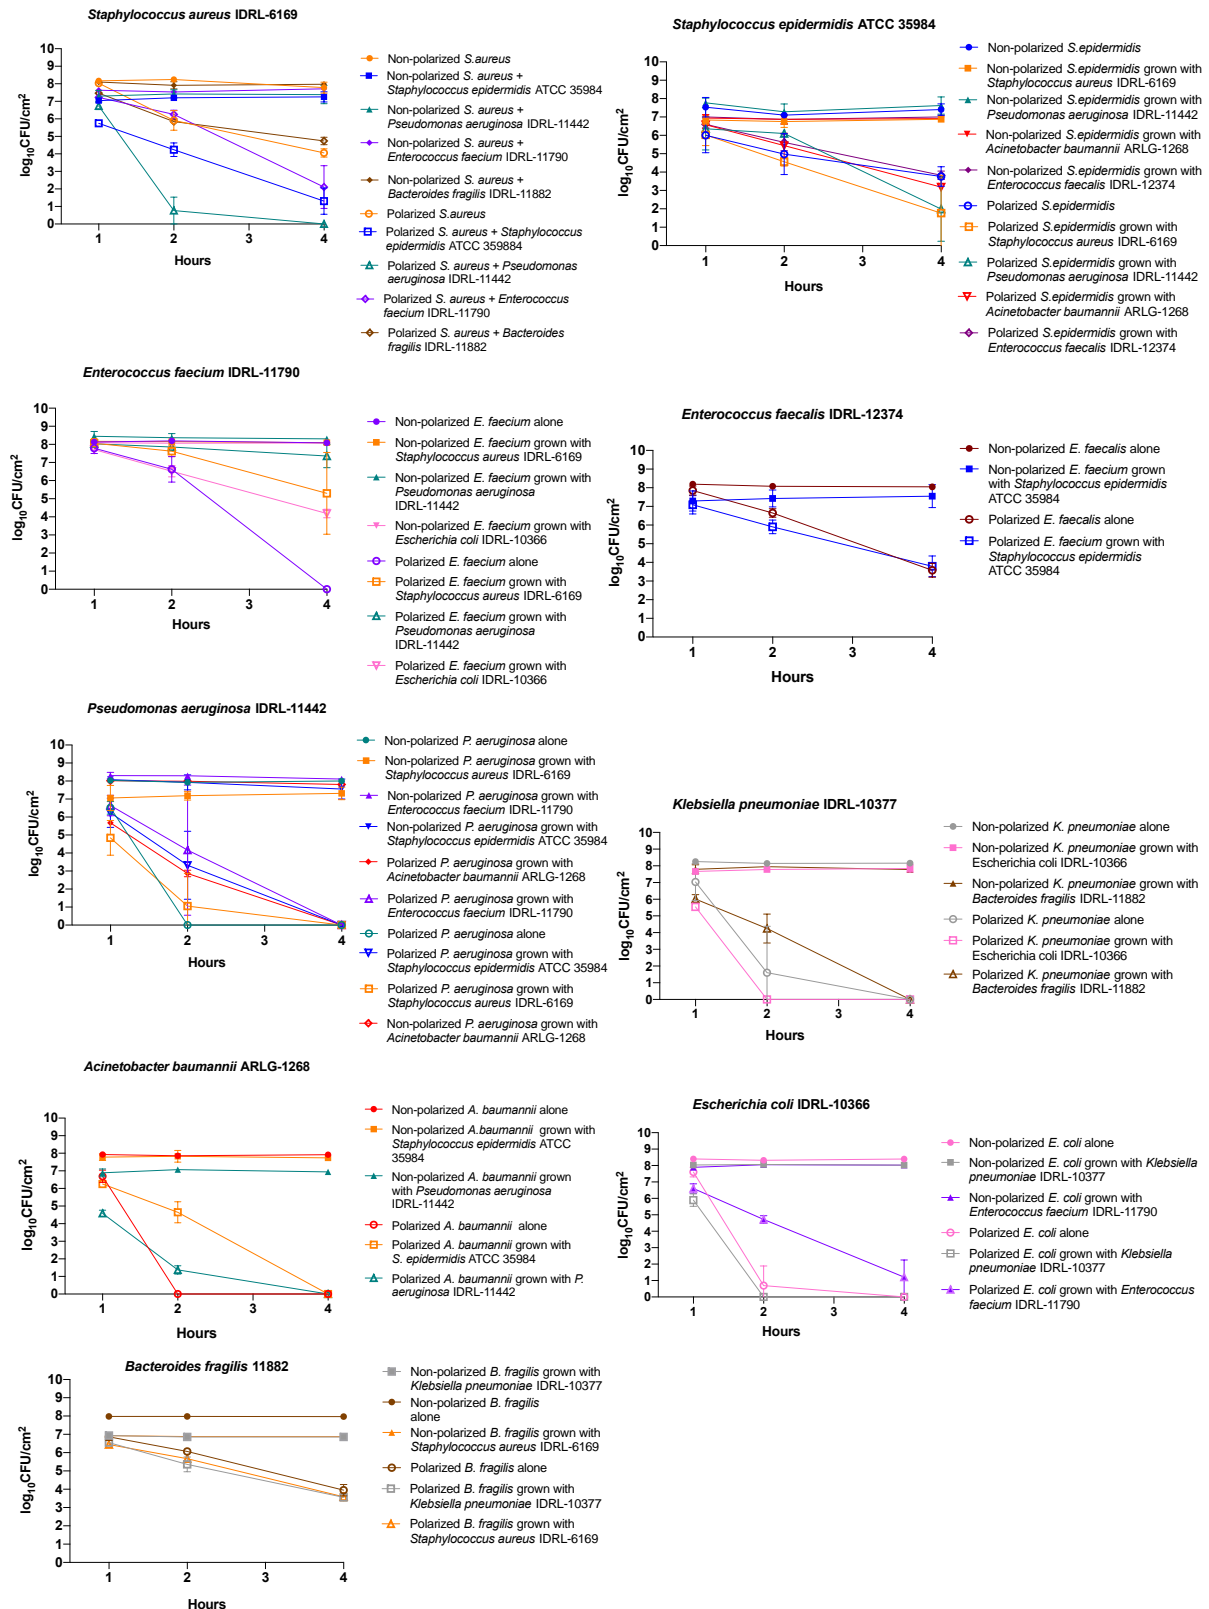

**Figure S1. Results of treatment of mono-species compared to dual-species biofilms, by strain**

Results are displayed at 1, 2 and 4 hours of treatment. Data is plotted as means and error bars represent standard deviations.
